# Supplementary material for: Evaluation of Rice Straw, Corncob, and Soybean Straw as Substrates for the Cultivation of Lepista sordida
Source: MDPI journal article supplement (doi:10.3390/life14010101), 2024-01-08
Supplement: s1 [file s1]

**Table S1.** Fruiting body morphology of *Lepista sordida* mushrooms grown on different substrates (means  $\pm$  SD)

| Substrate | Mycelial Colonization Time (days) | Primordial Initiation Time (days) | Pileus Diameter (cm) | Pileus Thickness (cm) | Stipe Thickness (cm) | Stipe Length (cm) |
|-----------|-----------------------------------|-----------------------------------|----------------------|-----------------------|----------------------|-------------------|
| T1        | 20.67 $\pm$ 2.08b                 | 16.33 $\pm$ 0.58c                 | 5.83 $\pm$ 0.37b     | 0.97 $\pm$ 0.09b      | 0.59 $\pm$ 0.08b     | 5.62 $\pm$ 0.23b  |
| T2        | 21.33 $\pm$ 0.58a                 | 18.33 $\pm$ 0.58b                 | 6.02 $\pm$ 0.39a     | 1.04 $\pm$ 0.12a      | 0.61 $\pm$ 0.07ab    | 5.89 $\pm$ 0.54a  |
| T3        | 22.33 $\pm$ 0.58a                 | 19.67 $\pm$ 0.58a                 | 6.10 $\pm$ 0.31a     | 1.05 $\pm$ 0.09a      | 0.63 $\pm$ 0.06a     | 5.63 $\pm$ 0.17b  |

Note: Different case letters represent significant differences ( $p < 0.05$ ). T1: 56% rice straw, 40% cow dung, 2% lime, 1% gypsum, and 1% calcium superphosphate; T2: 56% corncob, 40% cow dung, 2% lime, 1% gypsum, and 1% calcium superphosphate; T3: 56% soybean straw, 40% cow dung, 2% lime, 1% gypsum, and 1% calcium superphosphate. SD, standard deviation. T, treatment.

**Table S2.** Nutritional components of *Lepista sordida* mushrooms grown on different substrates. (means  $\pm$  SD) (g in 100 g of dry matter)

| Treatment Group | Crude Fiber      | Crude Fat        | Crude Polysaccharide | Crude Protein     | Ash               |
|-----------------|------------------|------------------|----------------------|-------------------|-------------------|
| T1              | 8.37 $\pm$ 0.04a | 7.07 $\pm$ 0.04a | 9.13 $\pm$ 0.01b     | 52.93 $\pm$ 0.07c | 13.33 $\pm$ 0.03b |
| T2              | 6.27 $\pm$ 0.03c | 3.42 $\pm$ 0.35b | 6.03 $\pm$ 0.01c     | 57.38 $\pm$ 0.08a | 12.11 $\pm$ 0.01c |
| T3              | 8.11 $\pm$ 0.04b | 6.93 $\pm$ 0.03a | 9.39 $\pm$ 0.01a     | 57.08 $\pm$ 0.10b | 13.73 $\pm$ 0.03a |

Note: Different lowercase letters above each bar in a given group indicate significant differences ( $\alpha=0.05$ , ANOVA, LSD test). T1: treatment with 56% rice straw, 40% cow dung, 2% lime, 1% gypsum and 1% calcium superphosphate; T2: treatment with 56% corncob, 40% cow dung, 2% lime, 1% gypsum and 1% calcium superphosphate; T3: treatment with 56% soybean straw, 40% cow dung, 2% lime, 1% gypsum and 1% calcium superphosphate. ANOVA, one-way analysis of variance; LSD, least significant difference; SD, standard deviation. T, treatment.
